# Supplementary material for: Catalyst–electrolyte interface chemistry for electrochemical CO2 reduction
Source: Royal Society of Chemistry journal article supplement (doi:10.1039/d0cs00030b), 2020-01-01
Supplement: d0cs00030b1.pdf [file d0cs00030b1.pdf]

*Supporting Information*

# Catalyst-Electrolyte Interface Chemistry for Electrochemical CO<sub>2</sub> Reduction

Young Jin Sa,<sup>ab,†</sup> Chan Woo Lee,<sup>c,†</sup> Si Young Lee,<sup>ad,†</sup> Jonggeol Na,<sup>e</sup> Ung Lee\*<sup>adf</sup> and Yun

Jeong Hwang\*<sup>adg</sup>

<sup>a</sup> Clean Energy Research Center, Korea Institute of Science and Technology (KIST), Seoul 02792, Republic of Korea.

<sup>b</sup> Department of Chemistry, Kwangwoon University, Seoul 01897, Republic of Korea.

<sup>c</sup> Department of Chemistry, Kookmin University, Seoul 02707, Republic of Korea.

<sup>d</sup> Division of Energy and Environmental Technology, KIST School, Korea University of Science and Technology (UST), Seoul 02792, Republic of Korea.

<sup>e</sup> Division of Chemical Engineering and Materials Science, Ewha Womans University, Seoul 03760, Republic of Korea.

<sup>f</sup> Green School, Korea University, Seoul 02841, Republic of Korea.

<sup>g</sup> Department of Chemical and Biomolecular Engineering and Yonsei-KIST Convergence Research Institute, Yonsei University, Seoul 03722, Republic of Korea.

<sup>†</sup>These authors contributed to equally to this work

\*Corresponding author Email: ulee@kist.re.kr (U.L.) and yjhwang@kist.re.kr (Y.J.H.)

**Table S1** Summary on the title, contents, and theme of previous review articles for electrochemical CO<sub>2</sub> reduction. The review articles can be categorized based on main focus: catalyst, electrolyte, cell design & process, mechanism, stability and comprehensive. The number of articles for each group corresponds to 63, 2, 13, 11, 1 and 10 in order.

| Ref.      | Title                                                                                                                                                       | Contents                                                                                                                                                                                                                                                                                                                                                                                                            | Theme                                                                                                                                         |
|-----------|-------------------------------------------------------------------------------------------------------------------------------------------------------------|---------------------------------------------------------------------------------------------------------------------------------------------------------------------------------------------------------------------------------------------------------------------------------------------------------------------------------------------------------------------------------------------------------------------|-----------------------------------------------------------------------------------------------------------------------------------------------|
| This work | Catalyst-Electrolyte Interface Chemistry for Electrochemical CO <sub>2</sub> Reduction                                                                      | <ol style="list-style-type: none"> <li>1. Introduction</li> <li><b>2. Technoeconomic perspectives of electrochemical CO<sub>2</sub> reduction</b></li> <li>3. Fundamentals of electrochemical CO<sub>2</sub> reduction</li> <li><b>4. Design of interfaces between catalyst and surface modulator</b></li> <li>5. Understanding catalyst-electrolyte interfaces</li> <li>6. Conclusions and perspectives</li> </ol> | Control of organic modulators, electrolyte ions, electrode structures and the three-phase boundary at the catalyst-electrolyte interface      |
| 1         | Advances and challenges in electrochemical CO <sub>2</sub> reduction processes: an engineering and design perspective looking beyond new catalyst materials | <ol style="list-style-type: none"> <li>1. Introduction</li> <li>2. Working principles of electrochemical CO<sub>2</sub> reduction</li> <li>3. Electrolyzer configurations</li> <li>4. Electrode structure</li> <li>5. Electrolyte selection</li> <li>6. pH effects</li> <li>7. Pressure and temperature effects</li> <li>8. Summary and outlook</li> </ol>                                                          | Electrolyzer configuration, electrode structure, electrolyte selection, pH control, and the electrolyzer's operating pressure and temperature |
| 2         | A disquisition on the active sites of heterogeneous catalysts for electrochemical reduction of CO <sub>2</sub> to value-added chemicals and fuel            | <ol style="list-style-type: none"> <li>1. Introduction</li> <li>2. Active Sites in Metal-Based Catalysts</li> <li>3. Active Sites in Metal-Carbon Catalysts</li> <li>4. Active Sites in Carbon-Based Catalysts</li> <li>5. Advanced Tools for Active Site Determination</li> <li>6. Machine Learning in CO<sub>2</sub>RR</li> <li>7. Summary and Outlook</li> </ol>                                                 | Design strategies of active sites                                                                                                             |
| 3         | Electrolytic cell design for electrochemical CO <sub>2</sub> reduction                                                                                      | <ol style="list-style-type: none"> <li>1. Introduction</li> <li>2. Electrochemical cell for CO<sub>2</sub>RR</li> <li>3. Summary and outlook</li> </ol>                                                                                                                                                                                                                                                             | Electrolytic cell design                                                                                                                      |
| 4         | An overview on the recent developments of Ag-based electrodes in the electrochemical reduction of CO <sub>2</sub> to CO                                     | <ol style="list-style-type: none"> <li>1. Introduction</li> <li>2. Ag-based nanostructured electrode materials</li> <li>3. Outlook on surface engineering</li> </ol>                                                                                                                                                                                                                                                | Material factors in Ag-based electrodes                                                                                                       |
| 5         | Metal-organic frameworks for electrochemical reduction of carbon dioxide: The role of metal centers                                                         | <ol style="list-style-type: none"> <li>1. Introduction</li> <li>2. Mechanism of electrocatalytic reduction of CO<sub>2</sub></li> <li>3. MOFs-based materials for electrochemical reduction of CO<sub>2</sub></li> <li>4. Conclusions and outlooks</li> </ol>                                                                                                                                                       | MOF-based electrocatalysts                                                                                                                    |
| 6         | Pushing the activity of CO <sub>2</sub> electroreduction by system engineering                                                                              | <ol style="list-style-type: none"> <li>1. Introduction</li> <li>2. Catalytic reactor design</li> <li>3. Renewable energy-driven systems</li> <li>4. System optimization</li> <li>5. Summary and outlook</li> </ol>                                                                                                                                                                                                  | Reactor architectures and system engineering                                                                                                  |
| 7         | Strategies for designing nanoparticles for electro- and photocatalytic CO <sub>2</sub> reduction                                                            | <ol style="list-style-type: none"> <li>1. Introduction</li> <li>2. Designer Metal Nanoparticles for Electrocatalytic CO<sub>2</sub>RR</li> <li>3. Designer Semiconductor Nanoparticles for Photocatalytic CO<sub>2</sub>RR</li> <li>4. Conclusion and Perspectives</li> </ol>                                                                                                                                       | Strategy of designing nanoparticles                                                                                                           |
| 8         | Rational design of Ag-based catalysts for the electrochemical CO <sub>2</sub> reduction to CO: A review                                                     | <ol style="list-style-type: none"> <li>1. Introduction</li> <li>2. Fundamentals of ECR</li> <li>3. Advances in silver-based CO<sub>2</sub>-to-CO electrocatalysts</li> </ol>                                                                                                                                                                                                                                        | Material factors in Ag-based electrodes                                                                                                       |

| 4. Summary and Outlook |                                                                                                                                        |                                                                                                                                                                                                                                                                                                                                                                                                                                                                                                     |                                                         |
|------------------------|----------------------------------------------------------------------------------------------------------------------------------------|-----------------------------------------------------------------------------------------------------------------------------------------------------------------------------------------------------------------------------------------------------------------------------------------------------------------------------------------------------------------------------------------------------------------------------------------------------------------------------------------------------|---------------------------------------------------------|
| 9                      | Electrochemical conversion of carbon dioxide to high value chemicals using gas-diffusion electrodes                                    | <ol style="list-style-type: none"> <li>1. Introduction</li> <li>2. Electrochemical CO<sub>2</sub> reduction</li> <li>3. Figures of merit for electrochemical CO<sub>2</sub> reduction</li> <li>4. Scaling up of electrochemical CO<sub>2</sub> reduction processes using gas diffusion electrodes</li> <li>5. GDE systems for various CO<sub>2</sub> reduction products</li> <li>6. Outlook for future research</li> </ol>                                                                          | gas diffusion electrodes and electrolyzers              |
| 10                     | Modelling chemical reactions on surfaces: The roles of chemical bonding and van der Waals interactions                                 | <ol style="list-style-type: none"> <li>1. Introduction</li> <li>2. Methods</li> <li>3. Applications: Modelling chemical reactions on metal surfaces</li> <li>4. More realistic conditions in chemical reactions</li> <li>5. Remaining challenges</li> <li>6. Conclusions</li> </ol>                                                                                                                                                                                                                 | Modelling electrocatalytic reduction of CO <sub>2</sub> |
| 11                     | Current progress of metallic and carbon-based nanostructure catalysts towards the electrochemical reduction of CO <sub>2</sub>         | <ol style="list-style-type: none"> <li>1. Introduction</li> <li>2. Size and morphology effect in ECR</li> <li>3. Crystal facet control</li> <li>4. Defect engineering</li> <li>5. Interface and surface modification</li> <li>6. Oxide derivation</li> <li>7. Conclusion and outlook</li> </ol>                                                                                                                                                                                                     | Design of nanostructured inorganic catalysts            |
| 12                     | Emerging nanostructured carbon-based non-precious metal electrocatalysts for selective electrochemical CO <sub>2</sub> reduction to CO | <ol style="list-style-type: none"> <li>1. Introduction</li> <li>2. Metal-free heteroatom-doped carbon materials</li> <li>3. Transition metal heteroatom codoped carbon materials</li> <li>4. Carbon-based hybrid materials</li> <li>5. Summary and outlook</li> </ol>                                                                                                                                                                                                                               | Carbon-based non-precious metal electrocatalysts        |
| 13                     | Interfacial effects in supported catalysts for electrocatalysis                                                                        | <ol style="list-style-type: none"> <li>1. Introduction</li> <li>2. Strategies to improve the formation of interfacial effects</li> <li>3. Application of interfacial effects in electrocatalysis</li> <li>4. Conclusion and Perspective</li> </ol>                                                                                                                                                                                                                                                  | Interfacial effects in supported catalysts              |
| 14                     | Electrolyte effects on the electrochemical reduction of CO <sub>2</sub>                                                                | <ol style="list-style-type: none"> <li>1. Introduction</li> <li>2. CO<sub>2</sub> reduction in aqueous electrolytes</li> <li>3. CO<sub>2</sub> reduction in non-aqueous electrolytes</li> <li>4. CO<sub>2</sub> reduction in electrolyte mixtures</li> <li>5. Summary and outlook</li> </ol>                                                                                                                                                                                                        | Electrolyte effects                                     |
| 15                     | Surface strategies for catalytic CO <sub>2</sub> reduction: from two-dimensional materials to nanoclusters to single atoms             | <ol style="list-style-type: none"> <li>1. Introduction</li> <li>2. Material synthesis and surface strategies for CO<sub>2</sub> reduction</li> <li>3. Challenges and opportunities</li> </ol>                                                                                                                                                                                                                                                                                                       | Nano-to-atomic surface strategies for catalysts         |
| 16                     | Carbon-based catalysts for electrochemical CO <sub>2</sub> reduction                                                                   | <ol style="list-style-type: none"> <li>1. Introduction</li> <li>2. Heteroatoms modification</li> <li>3. Transition metal- nitrogen- carbon Structure</li> <li>4. Combination with functional groups</li> <li>5. Conclusions and outlook</li> </ol>                                                                                                                                                                                                                                                  | Carbon-based catalysts and synthetic strategy           |
| 17                     | Review of two-dimensional materials for electrochemical CO <sub>2</sub> reduction from a theoretical perspective                       | <ol style="list-style-type: none"> <li>1. Introduction</li> <li>2. Possible reaction pathways of electrochemical of CO<sub>2</sub> reduction</li> <li>3. Discovery of 2D catalysts for electrochemical CO<sub>2</sub> reduction</li> <li>4. 2D transition metal dichalcogenides</li> <li>5. 2D structures of group-VA elements</li> <li>6. 2D metal-organic materials</li> <li>7. Transition-metal oxides</li> <li>8. Transition-metal carbides (MXENES)</li> <li>9. Summary and outlook</li> </ol> | 2D materials for CO <sub>2</sub> reduction              |
| 1. Introduction        |                                                                                                                                        |                                                                                                                                                                                                                                                                                                                                                                                                                                                                                                     |                                                         |

|    |                                                                                                                                           |                                                                                                                                                                                                                                                                                                                                                                     |                                                                                                    |
|----|-------------------------------------------------------------------------------------------------------------------------------------------|---------------------------------------------------------------------------------------------------------------------------------------------------------------------------------------------------------------------------------------------------------------------------------------------------------------------------------------------------------------------|----------------------------------------------------------------------------------------------------|
|    | electrocatalytic reactions provided by SERS                                                                                               | <ol style="list-style-type: none"> <li>Oxygen electrochemistry</li> <li>Electrochemistry of carbon monoxide and carbon dioxide</li> <li>Formic acid oxidation</li> <li>Summary</li> </ol>                                                                                                                                                                           | Raman spectroscopy for CO <sub>2</sub> reduction                                                   |
| 19 | Electrode materials engineering in electrocatalytic CO <sub>2</sub> reduction: Energy input and conversion efficiency                     | <ol style="list-style-type: none"> <li>Introduction</li> <li>Fundamentals</li> <li>Electrode materials for ECR system</li> <li>Conclusions and perspectives</li> </ol>                                                                                                                                                                                              | Anodic and cathodic materials in the photoanode-assisted electrochemical CO <sub>2</sub> reduction |
| 20 | Advanced engineering of core/shell nanostructures for electrochemical carbon dioxide reduction                                            | <ol style="list-style-type: none"> <li>Introduction</li> <li>Synthesis of core/shell materials</li> <li>A brief introduction of CO<sub>2</sub>RR</li> <li>Advanced regulations of core/shell nanomaterials for enhanced CO<sub>2</sub> electrocatalytic activity</li> <li>Conclusions and perspectives</li> </ol>                                                   | Electrocatalysts with a core/shell structure                                                       |
| 21 | Nitrogen-doped metal-free carbon catalysts for (electro)chemical CO <sub>2</sub> conversion and valorisation                              | <ol style="list-style-type: none"> <li>Introduction</li> <li>N-doped carbon materials in CO<sub>2</sub> valorisation</li> <li>Concluding remarks</li> </ol>                                                                                                                                                                                                         | Nitrogen doped metal free carbon catalysts                                                         |
| 22 | Solvents and supporting electrolytes in the electrocatalytic reduction of CO <sub>2</sub>                                                 | <ol style="list-style-type: none"> <li>Introduction</li> <li>Aqueous electrocatalytic CO<sub>2</sub> reduction</li> <li>Non-aqueous electrocatalytic CO<sub>2</sub> reduction</li> </ol>                                                                                                                                                                            | The effects of supporting electrolytes and solvents                                                |
| 23 | In-situ infrared spectroscopy applied to the study of the electrocatalytic reduction of CO <sub>2</sub> : Theory, practice and challenges | <ol style="list-style-type: none"> <li>Introduction</li> <li>Fundamental aspects of infrared spectroscopy at electrode–electrolyte interfaces</li> <li>Experimental details of infrared spectroscopy at electrode–electrolyte interfaces</li> <li>Applications in the electrocatalytic reduction of CO<sub>2</sub></li> <li>Challenges and opportunities</li> </ol> | In-situ IR spectroscopy                                                                            |
| 24 | Recent advances in metal-organic frameworks for photo-/electrocatalytic CO <sub>2</sub> reduction                                         | <ol style="list-style-type: none"> <li>Introduction</li> <li>Photocatalytic CO<sub>2</sub> reduction in MOFs</li> <li>Electrocatalytic CO<sub>2</sub> reduction in MOFs</li> <li>Summary and Prospects</li> </ol>                                                                                                                                                   | MOF-based CO <sub>2</sub> reduction                                                                |
| 25 | Rational design of carbon-based metal-free catalysts for electrochemical carbon dioxide reduction: A review                               | <ol style="list-style-type: none"> <li>Introduction</li> <li>Engineering physical structure of CMs</li> <li>Engineering electronic structure of CMs</li> <li>Engineering CMs for CO<sub>2</sub>RR</li> <li>Conclusions and perspectives</li> </ol>                                                                                                                  | Design strategies of carbon-based metal-free materials                                             |
| 26 | Supported single atoms as new class of catalysts for electrochemical reduction of carbon dioxide                                          | <ol style="list-style-type: none"> <li>Introduction</li> <li>Electrocatalysts for CO<sub>2</sub>RR: from nanoparticles (NPs) to single atoms</li> <li>Electrochemical CO<sub>2</sub> conversion on single-atom catalysts</li> <li>Understanding the origin of CO<sub>2</sub>RR activity and reaction mechanisms</li> <li>Challenges and opportunities</li> </ol>    | Single-atom catalysts for CO <sub>2</sub> reduction                                                |
| 27 | Recent advances in intensified ethylene production—A review                                                                               | <ol style="list-style-type: none"> <li>Introduction</li> <li>Alternative approaches for ethylene production</li> <li>Challenges and opportunities for intensified ethylene production</li> <li>Summary</li> </ol>                                                                                                                                                   | Processes for intensified ethylene production                                                      |
| 28 | Advances and challenges in understanding the electrocatalytic conversion of carbon dioxide to fuels                                       | <ol style="list-style-type: none"> <li>Introduction</li> <li>Initial activation of CO<sub>2</sub></li> <li>Carbon–carbon bond formation</li> <li>Reaction and process conditions</li> <li>Electrode morphology and (sub)surface atoms</li> <li>In situ spectroscopic investigation of CO<sub>2</sub> reduction</li> </ol>                                           | Mechanistic understandings of CO <sub>2</sub> reduction reaction                                   |

|    |                                                                                                                                          |                                                                                                                                                                                                                                                                                                                                                                                    |                                                                                                                              |
|----|------------------------------------------------------------------------------------------------------------------------------------------|------------------------------------------------------------------------------------------------------------------------------------------------------------------------------------------------------------------------------------------------------------------------------------------------------------------------------------------------------------------------------------|------------------------------------------------------------------------------------------------------------------------------|
|    |                                                                                                                                          | 7. Computational approaches for CO <sub>2</sub> reduction<br>8. Future directions                                                                                                                                                                                                                                                                                                  |                                                                                                                              |
| 29 | Electrochemical CO <sub>2</sub> reduction into chemical feedstocks: From mechanistic electrocatalysis models to system design            | 1. Introduction<br>2. Techno-economic analysis of CO <sub>2</sub> RR<br>3. Computational insight into the reaction mechanisms<br>4. Catalysts for CO <sub>2</sub> electroreduction<br>5. System design for CO <sub>2</sub> electroreduction<br>6. Conclusions                                                                                                                      | Comprehensive review including techno-economic analysis, computational understandings, catalysts materials and system design |
| 30 | Engineering metal-organic frameworks for the electrochemical reduction of CO <sub>2</sub> : A minireview                                 | 1. Introduction<br>2. Main challenges for CO <sub>2</sub> ER<br>3. MOF-related catalysts for CO <sub>2</sub> ER<br>4. Concluding remarks                                                                                                                                                                                                                                           | Advantages and limitation of MOF-based catalysts in CO <sub>2</sub> reduction                                                |
| 31 | Structure-sensitivity and electrolyte effects in CO <sub>2</sub> electroreduction: From model studies to applications                    | 1. Introduction<br>2. Structure sensitivity in CO <sub>2</sub> reduction<br>3. Tuning the selectivity by engineering the electrolyte interface<br>4. Challenges and future directions                                                                                                                                                                                              | The effects of surface structure and electrolyte                                                                             |
| 32 | Current achievements and the future direction of electrochemical CO <sub>2</sub> reduction: A short review                               | 1. Introduction<br>2. Commercial plants and projects<br>3. An economic feasibility of produced chemicals<br>4. Liquid-phase electrochemical CO <sub>2</sub> reduction<br>5. Evolution into the gas-phase CO <sub>2</sub> electrolysis<br>6. Conclusion                                                                                                                             | CO <sub>2</sub> electrolysis systems and their industrial feasibility                                                        |
| 33 | Progress and perspectives of electrochemical CO <sub>2</sub> reduction on copper in aqueous electrolyte                                  | 1. Introduction<br>2. Considerations for conducting and comparing electrochemical CO <sub>2</sub> reduction experiments<br>3. Experimental probes of CO <sub>2</sub> reduction mechanisms<br>4. Theoretical studies on copper<br>5. Electrochemical CO <sub>2</sub> reduction pathways on Cu<br>6. Nanostructured Cu<br>7. Copper bimetallics<br>8. Conclusions and future outlook | Various factors and reaction mechanisms affecting Cu-based CO <sub>2</sub> reduction                                         |
| 34 | CO <sub>2</sub> conversion by membrane reactors                                                                                          | 1. Introduction<br>2. Low temperature ( $\leq 100$ °C) methods for CO <sub>2</sub> conversion<br>3. High temperature ( $> 100$ °C) membrane reactors for CO <sub>2</sub> conversion<br>4. Conclusions                                                                                                                                                                              | Electrochemical, photochemical, thermochemical membrane reactors for CO <sub>2</sub> reduction                               |
| 35 | CO <sub>2</sub> reduction on gas-diffusion electrodes and why catalytic performance must be assessed at commercially-relevant conditions | 1. Introduction<br>2. Effect of cell configuration and reaction rate on CO <sub>2</sub> reduction environments<br>3. Impact of high current densities on CO <sub>2</sub> reduction catalyst testing<br>4. Impact of high current densities on system design<br>Conclusion                                                                                                          | The effects of cell configuration and reaction rate on electrocatalytic system                                               |
| 36 | Rational design of transition metal-based materials for highly efficient electrocatalysis                                                | 1. Introduction<br>2. Creating more active sites<br>3. Improving the utilization of active sites<br>4. Modulation of electronic configuration<br>5. Control lattice facets<br>6. Conclusion and perspective                                                                                                                                                                        | Strategies to design metal-based electrocatalysts                                                                            |
| 37 | Carbon-supported single atom catalysts for electrochemical energy conversion and storage                                                 | 1. Introduction<br>2. Sample preparation<br>3. Electrocatalytic performance<br>4. Summaries and perspectives                                                                                                                                                                                                                                                                       | Synthetic strategies and electrocatalytic performances of single atom catalysts                                              |
| 38 | Surface and interface engineering in copper-based                                                                                        | 1. Introduction<br>2. Fundamental understanding of the CO <sub>2</sub> RR<br>3. Improving selectivity by interfacial                                                                                                                                                                                                                                                               | The fundamental role of the secondary metal in                                                                               |

|    |                                                                                                                       |                                                                                                                                                                                                                                                                       |                                                                                                                                                  |
|----|-----------------------------------------------------------------------------------------------------------------------|-----------------------------------------------------------------------------------------------------------------------------------------------------------------------------------------------------------------------------------------------------------------------|--------------------------------------------------------------------------------------------------------------------------------------------------|
|    | selective CO <sub>2</sub> electroreduction                                                                            | engineering<br>4. Theoretical prediction<br>5. General trends                                                                                                                                                                                                         | electrocatalysts                                                                                                                                 |
| 39 | Cu-based nanocatalysts for electrochemical reduction of CO <sub>2</sub>                                               | 1. Introduction<br>2. Electrochemical reduction of CO <sub>2</sub><br>3. Cu-based nanocatalysts for electrochemical reduction of CO <sub>2</sub><br>4. Conclusions                                                                                                    | Design strategies of Cu-based electrocatalysts                                                                                                   |
| 40 | Recent advances in the nanoengineering of electrocatalysts for CO <sub>2</sub> reduction                              | 1. Introduction<br>2. Bulk metallic catalysts for the ECR<br>3. Nanoengineering of catalysts for the ECR<br>4. Summary and outlook                                                                                                                                    | Nanoengineering strategies of electrocatalysts                                                                                                   |
| 41 | Electrolytic CO <sub>2</sub> reduction in a flow cell                                                                 | 1. Introduction<br>2. Flow-cell architectures<br>3. Gas phase CO <sub>2</sub> electrolysis flow cells<br>4. CO <sub>2</sub> flow cell optimization<br>5. Conclusions and perspectives                                                                                 | System-level strategies of membrane-based flow cells and microfluidic reactors                                                                   |
| 42 | Electrocatalytic alloys for CO <sub>2</sub> reduction                                                                 | 1. Introduction<br>2. CO <sub>2</sub> → CO with electrocatalytic alloys<br>3. CO <sub>2</sub> → formate with electrocatalytic alloys<br>4. CO <sub>2</sub> → C <sub>2</sub> with electrocatalytic alloys<br>5. Summary and perspective                                | Summary on various reported alloys                                                                                                               |
| 43 | Progress and perspective of electrocatalytic CO <sub>2</sub> reduction for renewable carbonaceous fuels and chemicals | 1. Introduction<br>2. Electrocatalysts for electrocatalytic CO <sub>2</sub> reduction<br>3. Product selectivity in electrocatalytic CO <sub>2</sub> reduction<br>4. Challenges and perspectives                                                                       | Metal–organic complexes, metals, metal alloys, inorganic metal compounds and carbon-based metal-free nanomaterials for CO <sub>2</sub> reduction |
| 44 | Understanding the heterogeneous electrocatalytic reduction of carbon dioxide on oxide-derived catalysts               | 1. Introduction<br>2. Effects of pH and electrolyte on the performance and selectivity of CO <sub>2</sub> reduction on oxide catalysts<br>3. Analysis of the performance and mechanisms of oxide-derived catalysts<br>4. Conclusions                                  | The effect of oxygen, surface morphologies, and local pH gradients on the catalysis of CO <sub>2</sub> reduction                                 |
| 45 | Tuning of CO <sub>2</sub> reduction selectivity on metal electrocatalysts                                             | 1. Introduction<br>2. Option of electrolytes<br>3. Design of electrocatalysts<br>4. Conclusion and perspective                                                                                                                                                        | The rational selection of electrolytes and design of electrocatalysts                                                                            |
| 46 | Metal-free carbon materials for CO <sub>2</sub> electrochemical reduction                                             | 1. Introduction<br>2. Mechanics of the CO <sub>2</sub> RR on metal-free carbon materials<br>3. Metal-free carbon electrocatalysts for the CO <sub>2</sub> RR<br>4. Conclusions and outlook                                                                            | Carbon materials with heteroatom doping as metal-free catalysts                                                                                  |
| 47 | CO <sub>2</sub> reduction: From the electrochemical to photochemical approach                                         | 1. Introduction<br>2. Fundamentals of electrocatalytic and photocatalytic CO <sub>2</sub> reduction<br>3. Electrocatalytic materials for CO <sub>2</sub> reduction<br>4. Photocatalytic materials for CO <sub>2</sub> reduction<br>5. Conclusion and perspectives     | Electrocatalysts and photocatalysts for CO <sub>2</sub> reduction                                                                                |
| 48 | Fundamentals and challenges of electrochemical CO <sub>2</sub> reduction using two-dimensional materials              | 1. Introduction<br>2. A perspective of electrochemical CO <sub>2</sub> reduction<br>3. 2D nanosheet catalysis of CO <sub>2</sub> electroreduction<br>4. Strategies for improving CO <sub>2</sub> electrocatalytic activity of 2D nanosheets<br>5. Summary and outlook | Strategies for tuning catalytic activities of 2D materials                                                                                       |
| 49 | Nanostructured materials for heterogeneous electrocatalytic                                                           | 1. Introduction<br>2. Crucial parameters for CO <sub>2</sub> electroreduction tests                                                                                                                                                                                   | Material factors determining the                                                                                                                 |

|    |                                                                                                                                                   |                                                                                                                                                                                                                                                                                                              |                                                                                                                                                           |
|----|---------------------------------------------------------------------------------------------------------------------------------------------------|--------------------------------------------------------------------------------------------------------------------------------------------------------------------------------------------------------------------------------------------------------------------------------------------------------------|-----------------------------------------------------------------------------------------------------------------------------------------------------------|
|    | reaction mechanisms                                                                                                                               | 3. Reaction setup for CO <sub>2</sub> electroreduction<br>4. Reaction mechanism and pathways<br>5. Summary and perspectives                                                                                                                                                                                  | electroreduction                                                                                                                                          |
| 50 | Continuous-flow electroreduction of carbon dioxide                                                                                                | 1. Introduction<br>2. Reactor designs<br>3. Materials<br>4. Operation<br>5. How to benchmark a CO <sub>2</sub> electrolyzer correctly?<br>6. Photoelectrochemical reduction of CO <sub>2</sub> in continuous-flow<br>7. Summary and outlook                                                                  | The effects of cell design, employed materials and operational conditions                                                                                 |
| 51 | Recent progress on bismuth-based nanomaterials for electrocatalytic carbon dioxide reduction                                                      | 1. Introduction<br>2. Fundamentals for electrocatalytic CO <sub>2</sub> RR<br>3. Various Bi-based nanomaterials for electrocatalytic CO <sub>2</sub> RR<br>4. Summary and outlook                                                                                                                            | Bi-based electrocatalytic materials                                                                                                                       |
| 52 | Recent advances in atomic-level engineering of nanostructured catalysts for electrochemical CO <sub>2</sub> reduction                             | 1. Introduction<br>2. Measurement system and evaluation parameters for ECR<br>3. Reaction mechanism<br>4. Advanced characterization techniques for verifying structural information at atomic scale<br>5. Modifying the nanostructured electrocatalysts at atomic scale toward ECR<br>6. Summary and outlook | Design strategies of nanostructured electrocatalysts at the atomic level                                                                                  |
| 53 | Mechanistic understanding of the electrocatalytic CO <sub>2</sub> reduction reaction - New developments based on advanced instrumental techniques | 1. Introduction<br>2. Reaction pathways<br>3. Commonly used theoretical methods for mechanistic investigations<br>4. Advanced instrumental techniques for mechanistic investigations<br>5. Conclusions and outlook                                                                                           | Instrumental techniques for the mechanistic study of the electrochemical CO <sub>2</sub> reduction                                                        |
| 54 | In-situ spectroscopic techniques as critical evaluation tools for electrochemical carbon dioxide reduction: A mini review                         | 1. Introduction<br>2. Reaction mechanism of CO <sub>2</sub> RR<br>3. In-situ techniques for electrochemical CO <sub>2</sub> reduction<br>4. Summary and outlook                                                                                                                                              | Electrochemical and non-electrochemical techniques as critical evaluation tools for electrocatalysts                                                      |
| 55 | Heterostructured catalysts for electrocatalytic and photocatalytic carbon dioxide reduction                                                       | 1. Introduction<br>2. CO <sub>2</sub> reduction pathways<br>3. Heterostructures in electrocatalytic CO <sub>2</sub> reduction<br>4. Heterostructures in photocatalytic CO <sub>2</sub> reduction<br>5. Mechanisms of photocatalysis: Type II, Z-Scheme, p-n heterojunctions<br>6. Conclusions and outlook    | Heterostructured catalysts pertaining to electrocatalytic and photocatalytic carbon dioxide reduction                                                     |
| 56 | Current progress in electrocatalytic carbon dioxide reduction to fuels on heterogeneous catalysts                                                 | 1. Introduction<br>2. Research progress<br>3. Conclusions and perspectives                                                                                                                                                                                                                                   | The design of effective catalysts with lower overpotential, high FE, and product selectivity                                                              |
| 57 | Transition metal-nitrogen sites for electrochemical carbon dioxide reduction reaction                                                             | 1. Introduction<br>2. Metal-nitrogen containing macrocyclic complexes<br>3. Metal organic frameworks (MOFs)<br>4. Carbon-based metal-nitrogen materials<br>5. Reaction parameters and proposed mechanisms<br>6. Conclusion and outlooks                                                                      | M-N <sub>x</sub> sites-containing transition metal-centered macrocyclic complexes, metal organic frameworks, and M-N <sub>x</sub> -doped carbon materials |
| 58 | Metal-nitrogen-carbon electrocatalysts for CO <sub>2</sub>                                                                                        | 1. CO <sub>2</sub> valorization and syngas generation<br>2. Metal-nitrogen-carbon electrocatalysts for syngas generation, a selectivity and economical perspective                                                                                                                                           | M-N-C electrocatalysts and cell design for                                                                                                                |

|    |                                                                                                                                                    |                                                                                                                                                                                                                                                                                                                                                                                                                                                                                                                                                                                                                                                            |                                                                                                                               |
|----|----------------------------------------------------------------------------------------------------------------------------------------------------|------------------------------------------------------------------------------------------------------------------------------------------------------------------------------------------------------------------------------------------------------------------------------------------------------------------------------------------------------------------------------------------------------------------------------------------------------------------------------------------------------------------------------------------------------------------------------------------------------------------------------------------------------------|-------------------------------------------------------------------------------------------------------------------------------|
|    |                                                                                                                                                    | <ol style="list-style-type: none"> <li>3. The active sites of metal-nitrogen-carbon electrocatalysts for CO<sub>2</sub>RR</li> <li>4. Toward syngas generation at an industrial scale</li> <li>5. Summary and outlook</li> </ol>                                                                                                                                                                                                                                                                                                                                                                                                                           |                                                                                                                               |
| 59 | An overview of Cu-based heterogeneous electrocatalysts for CO <sub>2</sub> reduction                                                               | <ol style="list-style-type: none"> <li>1. Introduction</li> <li>2. A note for conducting EC CO<sub>2</sub> reduction</li> <li>3. Significant progress in the study of Cu-based heterogeneous for EC CO<sub>2</sub> reduction</li> <li>4. A brief review for Cu-based heterogeneous catalysts for EC CO<sub>2</sub> reduction</li> <li>5. Electrolyte effect on CO<sub>2</sub> reduction with Cu-based heterogeneous electrocatalysts</li> <li>6. EC/PEC CO<sub>2</sub> reduction and H<sub>2</sub>O oxidation as an overall reaction system for Cu-based electrocatalysts</li> <li>7. Summary and outlook</li> </ol>                                       | Cu-based heterogeneous electrocatalysts and electrolyte effects                                                               |
| 60 | Electrochemical CO <sub>2</sub> reduction: from nanoclusters to single atom catalysts                                                              | <ol style="list-style-type: none"> <li>1. Introduction</li> <li>2. Fundamentals of electrochemical CO<sub>2</sub> reduction</li> <li>3. ECR applications of NCs catalysts</li> <li>4. ECR applications of SACs</li> <li>5. Summary and perspectives</li> </ol>                                                                                                                                                                                                                                                                                                                                                                                             | Electrocatalytic properties of nanoclusters and single atom catalysts                                                         |
| 61 | Transforming the carbon economy: challenges and opportunities in the convergence of low-cost electricity and reductive CO <sub>2</sub> utilization | <ol style="list-style-type: none"> <li>1. Introduction</li> <li>2. Direct electrochemical</li> <li>3. Non-thermal plasma</li> <li>4. Direct bioelectrochemical</li> <li>5. Indirect bioelectrochemical</li> <li>6. Indirect thermochemical</li> <li>7. Summary and cross-comparison of CO<sub>2</sub>R pathways</li> <li>8. General considerations for CO<sub>2</sub>R</li> <li>9. Evaluation of CO<sub>2</sub>R products</li> <li>10. Conclusions</li> </ol>                                                                                                                                                                                              | Technical barriers and economic viability of electrochemical, thermocatalytic and biological CO <sub>2</sub> utilization      |
| 62 | Electrocatalytic reduction of carbon dioxide: opportunities with heterogeneous molecular catalysts                                                 | <ol style="list-style-type: none"> <li>1. Introduction</li> <li>2. Fundamentals of heterogeneous molecular catalysts for CO<sub>2</sub> reduction</li> <li>3. Non-covalent immobilization technique</li> <li>4. Covalent immobilization technique</li> <li>5. Periodic immobilization technique</li> <li>6. The stability of heterogeneous molecular catalysts</li> <li>7. The influence of catalysts' utilization on the CO<sub>2</sub> conversion</li> <li>8. The influence of the supports on the CO<sub>2</sub> conversion</li> <li>9. Designing suitable catalysts for CO<sub>2</sub> conversion</li> <li>10. Conclusions and perspectives</li> </ol> | Methods for heterogeneous immobilization of homogeneous molecular catalysts for CO <sub>2</sub> reduction                     |
| 63 | Electrochemical CO <sub>2</sub> reduction to CO catalyzed by 2D nanostructures                                                                     | <ol style="list-style-type: none"> <li>1. Introduction</li> <li>2. Fundamentals of electrochemical CO<sub>2</sub> reduction</li> <li>3. 2D electrocatalysts</li> <li>4. Conclusions</li> </ol>                                                                                                                                                                                                                                                                                                                                                                                                                                                             | Two-dimensional graphene and transition metal chalcogenides for CO <sub>2</sub> reduction                                     |
| 64 | Electrochemical CO <sub>2</sub> reduction on nanostructured metal electrodes: fact or defect?                                                      | <ol style="list-style-type: none"> <li>1. Introduction</li> <li>2. Onset potential</li> <li>3. Selectivity and stability</li> <li>4. Activity and current density</li> <li>5. Mass transport effects</li> <li>6. Conclusions</li> </ol>                                                                                                                                                                                                                                                                                                                                                                                                                    | The effects of active surface area and thickness of the catalytic layer on activity, selectivity, stability and mass transfer |
| 65 | Strategies in catalysts and electrolyzer design for electrochemical CO <sub>2</sub> reduction                                                      | <ol style="list-style-type: none"> <li>1. Introduction</li> <li>2. Multicarbon hydrocarbons</li> <li>3. Multicarbon oxygenates</li> </ol>                                                                                                                                                                                                                                                                                                                                                                                                                                                                                                                  | Electrocatalysts, electrode/reactor design and corresponding                                                                  |



|    |                                                                                                                                                          |                                                                                                                                                                                                                                                                                                                                                                                      |                                                                                                                                                          |
|----|----------------------------------------------------------------------------------------------------------------------------------------------------------|--------------------------------------------------------------------------------------------------------------------------------------------------------------------------------------------------------------------------------------------------------------------------------------------------------------------------------------------------------------------------------------|----------------------------------------------------------------------------------------------------------------------------------------------------------|
|    | toward C <sub>2+</sub> products                                                                                                                          | 4. Design of the electroreduction cell<br>5. Summary and outlook                                                                                                                                                                                                                                                                                                                     | mechanisms for C-C coupling                                                                                                                              |
| 66 | Recent progress in self-supported catalysts for CO <sub>2</sub> electrochemical reduction                                                                | 1. Introduction<br>2. Self-supported catalysts for electrochemical CO <sub>2</sub> reduction<br>3. Organically doped metal electrocatalysts<br>4. Nanostructured materials on metal foils<br>5. Metal nanoarrays on conductive substrate<br>6. Heteroatom-doped carbon materials<br>7. Conclusions                                                                                   | Synthesis methods, chemical compositions, nanostructures, and catalytic efficiencies of self-supported catalysts                                         |
| 67 | Mechanistic understanding of CO <sub>2</sub> reduction reaction (CO <sub>2</sub> RR) toward multicarbon products by heterogeneous copper-based catalysts | 1. Introduction<br>2. CO <sub>2</sub> RR and CORR: DFT insights<br>3. Summary and perspectives                                                                                                                                                                                                                                                                                       | Mechanistic reaction pathways for multicarbon products                                                                                                   |
| 68 | Durable cathodes and electrolyzers for the efficient aqueous electrochemical reduction of CO <sub>2</sub>                                                | 1. Introduction<br>2. Recent durability and stability studies of cathodes for CO <sub>2</sub> RR<br>3. Failure modes of CO <sub>2</sub> electrolyzer components<br>4. CO <sub>2</sub> RR durability and degradation characterization protocols<br>5. Summary and outlook                                                                                                             | Reported durability studies and degradation mechanisms                                                                                                   |
| 69 | CO <sub>2</sub> reduction: From homogeneous to heterogeneous electrocatalysis                                                                            | 1. Introduction<br>2. Homogeneous catalysis<br>3. Surface catalysis<br>4. Surface nanocatalysis<br>5. Conclusions and outlook                                                                                                                                                                                                                                                        | Homogeneous and heterogeneous catalysis of transition-metal complex catalysts for CO <sub>2</sub> reduction                                              |
| 70 | Promises of main group metal-based nanostructured materials for electrochemical CO <sub>2</sub> reduction to formate                                     | 1. Introduction<br>2. Fundamentals of electrochemical CO <sub>2</sub> reduction<br>3. Main group metal-based electrocatalysts for selective CO <sub>2</sub> RR to formate<br>4. Flow cells or membrane electrode assembly cells<br>5. Mechanistic studies using in situ characterization techniques<br>6. Summary and outlook                                                        | Main group metal-based (Sn, Bi, In, Pb, Sb) electrocatalysts, cell design and mechanistic studies for selective CO <sub>2</sub> reduction to formic acid |
| 71 | Carbon-rich nonprecious metal single atom electrocatalysts for CO <sub>2</sub> reduction and hydrogen evolution                                          | 1. Introduction<br>2. Characterization and evaluation of carbon-rich NPMSACs for CRR and HER<br>3. Carbon-rich NPMSACs for CRR and HER<br>4. Conclusion                                                                                                                                                                                                                              | Structure-activity relationship of nonprecious metal single atom catalysts                                                                               |
| 72 | Two-dimensional electrocatalysts for efficient reduction of carbon dioxide                                                                               | 1. Introduction<br>2. Overview of the structure and properties of 2D materials<br>3. Synthesis of 2D materials<br>4. Applications of 2D materials in the eCO <sub>2</sub> RR<br>5. Challenges and outlook                                                                                                                                                                            | Structures and catalytic properties of 2D catalysts                                                                                                      |
| 73 | A review on photochemical, biochemical and electrochemical transformation of CO <sub>2</sub> into value-added products                                   | 1. Introduction<br>2. Carbon cycle and CO <sub>2</sub> emission<br>3. CO <sub>2</sub> capture and methodologies<br>4. Products obtained from CO <sub>2</sub> transformation<br>5. Photochemical transformation of CO <sub>2</sub><br>6. Biochemical transformation of CO <sub>2</sub><br>7. Electrochemical transformation of CO <sub>2</sub><br>8. Future research<br>9. Conclusion | Overview of CO <sub>2</sub> reduction using photochemical, biochemical and electrochemical methods                                                       |
| 74 | Strategies for bioelectrochemical CO <sub>2</sub> reduction                                                                                              | 1. Introduction<br>2. Electrochemical CO <sub>2</sub> reduction by enzymes<br>3. Electrochemical CO <sub>2</sub> reduction by cells<br>4. Conclusion and outlooks                                                                                                                                                                                                                    | CO <sub>2</sub> reduction catalyzed by electroactive enzymes and whole cells                                                                             |
|    |                                                                                                                                                          | 1. Introduction                                                                                                                                                                                                                                                                                                                                                                      |                                                                                                                                                          |

|    |                                                                                                                                                          |                                                                                                                                                                                                                                                                                                                                                                                                                            |                                                                                                                                                                                 |
|----|----------------------------------------------------------------------------------------------------------------------------------------------------------|----------------------------------------------------------------------------------------------------------------------------------------------------------------------------------------------------------------------------------------------------------------------------------------------------------------------------------------------------------------------------------------------------------------------------|---------------------------------------------------------------------------------------------------------------------------------------------------------------------------------|
|    | catalysts with atomic layer deposition for the reduction of carbon dioxide                                                                               | <ol style="list-style-type: none"> <li>2. Atomic layer deposition designed catalysts</li> <li>3. The applications of the ALD-designed novel catalyst materials for CO<sub>2</sub> reduction</li> <li>4. The significance of ALD-prepared materials in CO<sub>2</sub> reduction</li> <li>5. Summary and outlook</li> </ol>                                                                                                  | for the designs of the efficient catalyst nanomaterials in CO <sub>2</sub> reduction                                                                                            |
| 76 | Electrocatalytic water splitting and CO <sub>2</sub> reduction: Sustainable solutions via single-atom catalysts supported on 2D materials                | <ol style="list-style-type: none"> <li>1. Introduction</li> <li>2. SACs supported on 2D materials</li> <li>3. Energy harvesting applications with 2D materials</li> <li>4. Conclusion and perspectives</li> </ol>                                                                                                                                                                                                          | Single-atom catalysts supported on 2D materials                                                                                                                                 |
| 77 | Heterogeneous molecular catalysts for electrocatalytic CO <sub>2</sub> reduction                                                                         | <ol style="list-style-type: none"> <li>1. Introduction</li> <li>2. Metal center</li> <li>3. Extrinsic and intrinsic activity</li> <li>4. Mechanism of CO<sub>2</sub> reduction</li> <li>5. Ligand effects</li> <li>6. Electrode support effects</li> <li>7. Catalyst stability</li> <li>8. 3D and extended structures</li> <li>9. Best practices for data reporting</li> <li>10. Conclusions and future outlook</li> </ol> | Heterogeneous molecular catalysts for electrochemical CO <sub>2</sub> reduction including polymers, metal-organic frameworks, and covalent-organic frameworks                   |
| 78 | Alloy nanocatalysts for the electrochemical oxygen reduction (ORR) and the direct electrochemical carbon dioxide reduction reaction (CO <sub>2</sub> RR) | <ol style="list-style-type: none"> <li>1. Introduction</li> <li>2. Pt-based nanoalloys for the electrochemical oxygen reduction reaction</li> <li>3. Cu-based nanoalloys for the carbon dioxide reduction reaction</li> <li>4. Concluding future perspectives on nanoalloys</li> </ol>                                                                                                                                     | Pt-based and Cu-based nanoalloy electrocatalysts for ORR and CO <sub>2</sub> RR                                                                                                 |
| 79 | Supported molecular catalysts for the heterogeneous CO <sub>2</sub> electroreduction                                                                     | <ol style="list-style-type: none"> <li>1. Introduction</li> <li>2. Catalyst structure</li> <li>3. Immobilization strategy and support material</li> <li>4. Conclusions and perspectives</li> </ol>                                                                                                                                                                                                                         | Catalyst structure, immobilization strategy and support material of molecular catalysts for heterogeneous CO <sub>2</sub> reduction                                             |
| 80 | Advances in the electrochemical catalytic reduction of CO <sub>2</sub> with metal complexes                                                              | <ol style="list-style-type: none"> <li>1. Introduction</li> <li>2. Selected examples of molecular catalyst development</li> <li>3. Conclusions and perspectives</li> </ol>                                                                                                                                                                                                                                                 | Electrochemical catalytic reduction of CO <sub>2</sub> with metal complexes                                                                                                     |
| 81 | Pathways to industrial-scale fuel out of thin air from CO <sub>2</sub> electrolysis                                                                      | <ol style="list-style-type: none"> <li>1. Introduction</li> <li>2. Solar-driven synthesis routes for MeOH using CO<sub>2</sub> electrolyzers</li> <li>3. Energy efficiency and distribution of a solar-driven MeOH synthesis process</li> <li>4. Relative scale of each sub-process</li> <li>5. Future outlook and summary</li> </ol>                                                                                      | Integration of direct CO <sub>2</sub> air capture with CO <sub>2</sub> and H <sub>2</sub> O electrolyzers and a traditional MeOH synthesis step                                 |
| 82 | Probing CO <sub>2</sub> conversion chemistry on nanostructured surfaces with operando vibrational spectroscopy                                           | <ol style="list-style-type: none"> <li>1. Introduction</li> <li>2. Raman spectroelectrochemistry</li> <li>3. Surface-enhanced Raman spectroelectrochemistry</li> <li>4. Surface-selective infrared spectroelectrochemistry</li> <li>5. Surface-enhanced infrared absorption spectroelectrochemistry</li> <li>6. Emerging vibrational spectroscopy-based techniques</li> <li>7. Concluding remarks</li> </ol>               | Operando probing of electrochemical CO <sub>2</sub> reduction using Raman and infrared spectroscopy                                                                             |
| 83 | One-dimensional nanomaterial electrocatalysts for CO <sub>2</sub> fixation                                                                               | <ol style="list-style-type: none"> <li>1. Introduction</li> <li>2. Metallic 1D nanostructured materials</li> <li>3. Metal-based 1D nanomaterials</li> <li>4. Carbon-based 1D nanomaterials</li> <li>5. Conclusion and Outlook</li> </ol>                                                                                                                                                                                   | 1D nanomaterials for CO <sub>2</sub> electroreduction, including including metals, transition-metal oxides/nitrides, transition-metal chalcogenides, and carbon-based materials |

|    |                                                                                                                                                  |                                                                                                                                                                                                                                                                                                                                                                                                                                                                                               |                                                                                                                            |
|----|--------------------------------------------------------------------------------------------------------------------------------------------------|-----------------------------------------------------------------------------------------------------------------------------------------------------------------------------------------------------------------------------------------------------------------------------------------------------------------------------------------------------------------------------------------------------------------------------------------------------------------------------------------------|----------------------------------------------------------------------------------------------------------------------------|
| 84 | Advances in Sn-based catalysts for electrochemical CO <sub>2</sub> reduction                                                                     | <ol style="list-style-type: none"> <li>1. Introduction</li> <li>2. Reaction mechanism and pathways of the Sn-based electrocatalysts</li> <li>3. Advanced Sn-based catalysts for electrochemical CO<sub>2</sub> reduction</li> <li>4. Conclusions and outlook</li> </ol>                                                                                                                                                                                                                       | Various Sn-based electrocatalysts and reaction mechanisms                                                                  |
| 85 | Recent trends, benchmarking, and challenges of electrochemical reduction of CO <sub>2</sub> by molecular catalysts                               | <ol style="list-style-type: none"> <li>1. Introduction</li> <li>2. Metal molecular catalysts</li> <li>3. Metal-free organic catalysts</li> <li>4. Conclusions and outlook</li> </ol>                                                                                                                                                                                                                                                                                                          | Molecular catalysts and design principles for CO <sub>2</sub> electroreduction                                             |
| 86 | Carbon dioxide photo/electroreduction with cobalt                                                                                                | <ol style="list-style-type: none"> <li>1. Introduction</li> <li>2. Catalytic reduction mechanism</li> <li>3. Types of Co-containing catalysts for CO<sub>2</sub> reduction</li> <li>4. Performance of CO<sub>2</sub> reduction based on Co-containing catalysts</li> <li>5. Conclusion and perspective</li> </ol>                                                                                                                                                                             | CO <sub>2</sub> photo/electroreduction with Co catalysts                                                                   |
| 87 | A look at periodic trends in d-block molecular electrocatalysts for CO <sub>2</sub> reduction                                                    | <ol style="list-style-type: none"> <li>1. Introduction</li> <li>2. Electrochemical CO<sub>2</sub> reduction with transition metal complexes</li> <li>3. Horizontal trends in transition metal complexes for CO<sub>2</sub> reduction</li> <li>4. Vertical trends in transition metal complexes for CO<sub>2</sub> reduction</li> <li>5. Ligand design and evolution for CO<sub>2</sub> reduction</li> <li>6. Formic acid producing catalysts</li> <li>7. Conclusions and prospects</li> </ol> | Trends of activity, electronic structure of catalytic intermediates and product selectivity in mononuclear complexes       |
| 88 | Secondary-sphere effects in molecular electrocatalytic CO <sub>2</sub> reduction                                                                 | <ol style="list-style-type: none"> <li>1. Introduction</li> <li>2. Enzymes for the interconversion CO<sub>2</sub> and CO or formic acid</li> <li>3. Emerging systems</li> <li>4. Conclusions and outlook</li> </ol>                                                                                                                                                                                                                                                                           | Secondary-sphere strategies of molecular catalysts to facilitate rapid and selective CO <sub>2</sub> reduction             |
| 89 | Theoretical insights into heterogeneous (photo)electrochemical CO <sub>2</sub> reduction                                                         | <ol style="list-style-type: none"> <li>1. Introduction</li> <li>2. Heterogeneous CO<sub>2</sub> photoelectrochemical reduction</li> <li>3. Heterogeneous CO<sub>2</sub> electrochemical reduction</li> <li>4. Discussion and outlook</li> <li>5. Summary</li> </ol>                                                                                                                                                                                                                           | Theoretical studies of heterogeneous (photo)electrochemical reduction                                                      |
| 90 | Defect engineering in earth-abundant electrocatalysts for CO <sub>2</sub> and N <sub>2</sub> reduction                                           | <ol style="list-style-type: none"> <li>1. Introduction</li> <li>2. Concept, characterization and engineering strategy of defect</li> <li>3. Defect engineering for electrocatalytic CRR and NRR</li> <li>4. Conclusions</li> </ol>                                                                                                                                                                                                                                                            | The type, regulation strategy, fine characterization methods of defect and the application in electrocatalytic CRR and NRR |
| 91 | Understanding the roadmap for electrochemical reduction of CO <sub>2</sub> to multi-carbon oxygenates and hydrocarbons on copper-based catalysts | <ol style="list-style-type: none"> <li>1. Introduction</li> <li>2. Atomistic mechanism of various C<sub>2</sub> and C<sub>3</sub> products</li> <li>3. Factors influencing the thermodynamics and kinetics of CRR to C<sub>2</sub> products</li> <li>4. Design principles of C<sub>2</sub> electrocatalysts</li> <li>5. Technical issues</li> <li>6. Challenges and outlook</li> </ol>                                                                                                        | An in-depth discussion of the mechanistic aspects of various C <sub>2</sub> reaction pathways on copper-based catalysts    |
| 92 | Towards higher rate electrochemical CO <sub>2</sub> conversion: From liquid-phase to gas-phase systems                                           | <ol style="list-style-type: none"> <li>1. Introduction</li> <li>2. CO<sub>2</sub> reduction reaction with liquid-phase reactor</li> <li>3. CO<sub>2</sub> reduction reaction with gas-phase reactor</li> <li>4. Summary and outlook</li> </ol>                                                                                                                                                                                                                                                | Gas-phase reactor systems for CO <sub>2</sub> reduction                                                                    |
|    | Emerging carbon-based heterogeneous catalysts for                                                                                                | <ol style="list-style-type: none"> <li>1. Introduction</li> <li>2. Challenges of the electrochemical reduction of CO<sub>2</sub></li> <li>3. Linear scaling relations for metal surfaces</li> </ol>                                                                                                                                                                                                                                                                                           | Metal-free doped carbon and aromatic N-                                                                                    |

|     |                                                                                                                                                                 |                                                                                                                                                                                                                                                                                                                                                                                     |                                                                                                                                                        |
|-----|-----------------------------------------------------------------------------------------------------------------------------------------------------------------|-------------------------------------------------------------------------------------------------------------------------------------------------------------------------------------------------------------------------------------------------------------------------------------------------------------------------------------------------------------------------------------|--------------------------------------------------------------------------------------------------------------------------------------------------------|
|     | chemicals                                                                                                                                                       | 4. Nonmetal heteroatom-doped carbon nanostructures<br>5. Aromatic nitrogen substituted heterocycles<br>6. Metal–nitrogen–carbon structure<br>7. Summary and outlook                                                                                                                                                                                                                 | reduction of CO <sub>2</sub>                                                                                                                           |
| 94  | Electrochemical carbon dioxide splitting                                                                                                                        | 1. Introduction<br>2. Fundamental principles<br>3. Recent progress towards practical electrochemical CO <sub>2</sub> splitting<br>4. Summary and perspectives                                                                                                                                                                                                                       | The roles of main components of electrochemical CO <sub>2</sub> splitting device, such as catalyst, electrode, electrolyzer, membrane, and electrolyte |
| 95  | Efficient and selective electrochemically driven enzyme-catalyzed reduction of carbon dioxide to formate using formate dehydrogenase and an artificial cofactor | 1. Introduction<br>2. Carbon dioxide reduction using metal-independent FDH and its natural cofactor, NADH<br>3. Replacing NADH with an artificial redox cofactor, methyl viologen<br>4. Methyl viologen is a unidirectional cofactor for FDH<br>5. Continuous reduction of carbon dioxide to formate in two-chamber and three-chamber electrolyzer configurations<br>6. Conclusions | Enzyme-catalyzed reduction of carbon dioxide to formate using formate dehydrogenase                                                                    |
| 96  | Single-atom catalysis toward efficient CO <sub>2</sub> conversion to CO and formate products                                                                    | 1. Introduction<br>2. Thermally stable SACS for selective CO <sub>2</sub> -to-CO conversion<br>3. Atomically dispersed Ni(I) SACs for highly efficient electrochemical CO <sub>2</sub> reduction reaction<br>4. A quasi-homogeneous SAC for aqueous-phase CO <sub>2</sub> hydrogenation under mild conditions<br>5. Conclusions and perspectives                                    | Single-atom catalysts in thermal catalysis and electrocatalysis for CO <sub>2</sub> reduction                                                          |
| 97  | Electrochemical reduction of CO <sub>2</sub> over heterogeneous catalysts in aqueous solution: recent progress and perspectives                                 | 1. Introduction<br>2. Mechanistic pathways of CO <sub>2</sub> electroreduction in aqueous media<br>3. Recent advances of electrocatalysts for improved performance and mechanistic understanding<br>4. Summary and perspectives                                                                                                                                                     | Underlying mechanistic studies and novel heterogeneous catalysts for electrochemical reduction of CO <sub>2</sub>                                      |
| 98  | Rational catalyst and electrolyte design for CO <sub>2</sub> electroreduction towards multicarbon products                                                      | 1. Introduction<br>2. Catalyst design for C <sub>2+</sub> products<br>3. Electrolyte design for C <sub>2+</sub> products<br>4. Summary and outlook                                                                                                                                                                                                                                  | Rational design of catalyst and electrolyte for multicarbon products                                                                                   |
| 99  | Theoretical insights into selective electrochemical conversion of carbon dioxide                                                                                | 1. Introduction<br>2. Challenges of electrochemical CO <sub>2</sub> reduction reactions<br>3. Strategies to tune intermediate binding<br>4. Conclusions                                                                                                                                                                                                                             | Design principles of catalyst and electrolyte based on calculational studies                                                                           |
| 100 | Nickel complexes as molecular catalysts for water splitting and CO <sub>2</sub> reduction                                                                       | 1. Introduction<br>2. Water splitting<br>3. Carbon dioxide reduction<br>4. Conclusions                                                                                                                                                                                                                                                                                              | Nickel complexes as molecular catalysts for water splitting and CO <sub>2</sub> reduction                                                              |

## Supplementary references

1. S. Garg, M. Li, A. Z. Weber, L. Ge, L. Li, V. Rudolph, G. Wang and T. E. Rufford, *J. Mater. Chem. A*, 2020, **8**, 1511–1544.
2. R. Daiyan, W. H. Saputera, H. Masood, J. Leverett, X. Lu and R. Amal, *Adv. Energy Mater.*, 2020, **10**, 1902106.

3. S. Liang, N. Altaf, L. Huang, Y. Gao and Q. Wang, *J. CO2 Util.*, 2020, **35**, 90–105.
4. S. A. Mahyoub, F. A. Qaraah, C. Chen, F. Zhang, S. Yan and Z. Cheng, *Sustain. Energy Fuels*, 2019, **4**, 50–67.
5. P. Shao, L. Yi, S. Chen, T. Zhou and J. Zhang, *J. Energy Chem.*, 2020, **40**, 156–170.
6. H. Shen, Z. Gu and G. Zheng, *Sci. Bull.*, 2019, **64**, 1805–1816.
7. J. Y. Choi, W. Choi, J. W. Park, C. K. Lim and H. Song, *Chem. Asian J.*, 2020, **15**, 253–265.
8. D. Sun, X. Xu, Y. Qin, S. P. Jiang and Z. Shao, *ChemSusChem*, 2020, **13**, 39–58.
9. S. Malkhandi and B. S. Yeo, *Curr. Opin. Chem. Eng.*, 2019, **26**, 112–121.
10. G. Su, S. Yang, Y. Jiang, J. Li, S. Li, J.-C. Ren and W. Liu, *Prog. Surf. Sci.*, 2019, **94**, 100561.
11. L. Hou, J. Yan, L. Takele, Y. Wang, X. Yan and Y. Gao, *Inorg. Chem. Front.*, 2019, **6**, 3363–3380.
12. X. Wang, Q. Zhao, B. Yang, Z. Li, Z. Bo, K. H. Lam, N. M. Adli, L. Lei, Z. Wen, G. Wu and Y. Hou, *J. Mater. Chem. A*, 2019, **7**, 25191–25202.
13. H. Li, C. Chen, D. Yan, Y. Wang, R. Chen, Y. Zou and S. Wang, *J. Mater. Chem. A*, 2019, **7**, 23432–23450.
14. M. M. de Salles Pupo and R. Kortlever, *ChemPhysChem*, 2019, **20**, 2926–2935.
15. L. Wang, W. Chen, D. Zhang, Y. Du, R. Amal, S. Qiao, J. Wu and Z. Yin, *Chem. Soc. Rev.*, 2019, **48**, 5310–5349.
16. C. Jia, K. Dastafkan, W. Ren, W. Yang and C. Zhao, *Sustainable Energy Fuels*, 2019, **3**, 2890–2906.
17. X. Zhu and Y. Li, *Wiley Interdiscip. Rev. Comput. Mol. Sci.*, 2019, **9**, e1416.
18. A. J. Keeler, G. R. Salazar-Banda and A. E. Russell, *Curr. Opin. Electrochem.*, 2019, **17**, 90–96.
19. R.-B. Song, W. Zhu, J. Fu, Y. Chen, L. Liu, J.-R. Zhang, Y. Lin and J.-J. Zhu, *Adv. Mater.*, 2019. DOI: 10.1002/adma.201903796.
20. Q. Shao, P. Wang, S. Liu and X. Huang, *J. Mater. Chem. A*, 2019, **7**, 20478–20493.
21. D. M. Fernandes, A. F. Peixoto and C. Freire, *Dalton Trans.*, 2019, **48**, 13508–13528.
22. M. König, J. Vaes, E. Klemm and D. Pant, *iScience*, 2019, **19**, 135–160.
23. R. Kas, O. Ayemoba, N. J. Firet, J. Middelkoop, W. A. Smith and A. Cuesta, *ChemPhysChem*, 2019, **20**, 2904–2925.
24. Q. Wang, Y. Zhang, H. Lin and J. Zhu, *Chem. Eur. J.*, 2019, **25**, 14026–14035.
25. S. Liu, H. Yang, X. Su, J. Ding, Q. Mao, Y. Huang, T. Zhang and B. Liu, *J. Energy Chem.*, 2019, **36**, 95–105.

26. Y. Cheng, S. Yang, S. P. Jiang and S. Wang, *Small Methods*, 2019, **3**, 1800440.
27. Y. Gao, L. Neal, D. Ding, W. Wu, C. Baroi, A. M. Gaffney and F. Li, *ACS Catal.*, 2019, **9**, 8592–8621.
28. Y. Y. Birdja, E. Pérez-Gallent, M. C. Figueiredo, A. J. Göttle, F. Calle-Vallejo and M. T. M. Koper, *Nat. Energy*, 2019, **4**, 732–745.
29. M. G. Kibria, J. P. Edwards, C. M. Gabardo, C.-T. Dinh, A. Seifitokaldani, D. Sinton and E. H. Sargent, *Adv. Mater.*, 2019, **31**, 1807166.
30. R. Wang, F. Kapteijn and J. Gascon, *Chem. Asian J.*, 2019, **14**, 3452–3461.
31. P. Sebastián-Pascual, S. Mezzavilla, I. E. L. Stephens and M. Escudero-Escribano, *ChemCatChem*, 2019, **11**, 3626–3645.
32. M.-Y. Lee, K. T. Park, W. Lee, H. Lim, Y. Kwon and S. Kang, *Crit. Rev. Environ. Sci. Technol.*, 2020, **50**, 769–815.
33. S. Nitopi, E. Bertheussen, S. B. Scott, X. Liu, A. K. Engstfeld, S. Horch, B. Seger, I. E. L. Stephens, K. Chan, C. Hahn, J. K. Nørskov, T. F. Jaramillo and I. Chorkendorff, *Chem. Rev.*, 2019, **119**, 7610–7672.
34. A. Brunetti and E. Fontananova, *J. Nanosci. Nanotechnol.*, 2019, **19**, 3124–3134.
35. T. Burdyny and W. A. Smith, *Energy Environ. Sci.*, 2019, **12**, 1442–1453.
36. S. Dou, X. Wang and S. Wang, *Small Methods*, 2019, **3**, 1800211.
37. Y. Peng, B. Lu and S. Chen, *Adv. Mater.*, 2018, **30**, 1801995.
38. A. Vasileff, C. Xu, Y. Jiao, Y. Zheng and S. Z. Qiao, *Chem*, 2018, **4**, 1809–1831.
39. H. Xie, T. Wang, J. Liang, Q. Li and S. Sun, *Nano Today*, 2018, **21**, 41–54.
40. F. Li, D. R. MacFarlane and J. Zhang, *Nanoscale*, 2018, **10**, 6235–6260.
41. D. M. Weekes, D. A. Salvatore, A. Reyes, A. Huang and C. P. Berlinguette, *Acc. Chem. Res.*, 2018, **51**, 910–918.
42. J. He, N. J. J. Johnson, A. Huang and C. P. Berlinguette, *ChemSusChem*, 2018, **11**, 48–57.
43. W. Zhang, Y. Hu, L. Ma, G. Zhu, Y. Wang, X. Xue, R. Chen, S. Yang and Z. Jin, *Adv. Sci.*, 2018, **5**, 1700275.
44. J. E. Pander, D. Ren, Y. Huang, N. W. X. Loo, S. H. L. Hong and B. S. Yeo, *ChemElectroChem*, 2018, **5**, 219–237.
45. Y. Wang, J. Liu, Y. Wang, A. M. Al-Enizi and G. Zheng, *Small*, 2017, **13**, 1701809.
46. X. Duan, J. Xu, Z. Wei, J. Ma, S. Guo, S. Wang, H. Liu and S. Dou, *Adv. Mater.*, 2017, **29**, 1701784.
47. J. Wu, Y. Huang, W. Ye and Y. Li, *Adv. Sci.*, 2017, **4**, 1700194.
48. Z. Sun, T. Ma, H. Tao, Q. Fan and B. Han, *Chem*, 2017, **3**, 560–587.

49. L. Zhang, Z.-J. Zhao and J. Gong, *Angew. Chem., Int. Ed.*, 2017, **56**, 11326–11353.
50. B. Endrődi, G. Bencsik, F. Darvas, R. Jones, K. Rajeshwar and C. Janáky, *Prog. Energy Combust. Sci.*, 2017, **62**, 133–154.
51. C. Yang, J. Chai, Z. Wang, Y. Xing, J. Peng and Q. Yan, *Chem. Res. Chinese Univ.*, 2020, **36**, 410–419.
52. H. Liu, Y. Zhu, J. Ma, Z. Zhang and W. Hu, *Adv. Funct. Mater.*, 2020, **30**, 1910534.
53. Y. Zhang, S.-X. Guo, X. Zhang, A. M. Bond and J. Zhang, *Nano Today*, 2020, **31**, 100835.
54. K. S. Adarsh, N. Chandrasekaran and V. Chakrapani, *Front. Chem.*, 2020, **8**, 137.
55. P. Prabhu, V. Jose and J.-M. Lee, *Adv. Funct. Mater.*, 2020, 1910768.
56. A. Liu, M. Gao, X. Ren, F. Meng, Y. Yang, L. Gao, Q. Yang and T. Ma, *J. Mater. Chem. A*, 2020, **8**, 3541–3562.
57. C. Yan, L. Lin, G. Wang and X. Bao, *Cuihua Xuebao/Chinese J. Catal.*, 2019, **40**, 23–37.
58. L. Delafontaine, T. Asset and P. Atanassov, *ChemSusChem*, 2020, **13**, 1688–1698.
59. J. Zhao, S. Xue, J. Barber, Y. Zhou, J. Meng and X. Ke, *J. Mater. Chem. A*, 2020, **8**, 4700–4734.
60. F. Lü, H. Bao, Y. Mi, Y. Liu, J. Sun, X. Peng, Y. Qiu, L. Zhuo, X. Liu and J. Luo, *Sustainable Energy Fuels*, 2020, **4**, 1012–1028.
61. R. G. Grim, Z. Huang, M. T. Guarnieri, J. R. Ferrell, L. Tao and J. A. Schaidle, *Energy Environ. Sci.*, 2020, **13**, 472–494.
62. L. Sun, V. Reddu, A. C. Fisher and X. Wang, *Energy Environ. Sci.*, 2020, **13**, 374–403.
63. C. B. Hiragond, H. Kim, J. Lee, S. Sorcar, C. Erkey and S.-I. In, *Catalysts*, 2020, **10**, 98.
64. R. Kas, K. Yang, D. Bohra, R. Kortlever, T. Burdyny and W. A. Smith, *Chem. Sci.*, 2020, **11**, 1738–1749.
65. L. Fan, C. Xia, F. Yang, J. Wang, H. Wang and Y. Lu, *Sci. Adv.*, 2020, **6**, eaay3111.
66. H. Yang, X. Wang, Q. Hu, X. Chai, X. Ren, Q. Zhang, J. Liu and C. He, *Small Methods*, 2020. DOI: 10.1002/smtd.201900826.
67. T. K. Todorova, M. W. Schreiber and M. Fontecave, *ACS Catal.*, 2020, **10**, 1754–1768.
68. U. O. Nwabara, E. R. Cofell, S. Verma, E. Negro and P. J. A. Kenis, *ChemSusChem*, 2020, **13**, 855–875.
69. S. Zhang, Q. Fan, R. Xia and T. J. Meyer, *Acc. Chem. Res.*, 2020, **53**, 255–264.
70. N. Han, P. Ding, L. He, Y. Li and Y. Li, *Adv. Energy Mater.*, 2020, **10**, 1902338.
71. T. Wang, Q. Zhao, Y. Fu, C. Lei, B. Yang, Z. Li, L. Lei, G. Wu and Y. Hou, *Small Methods*, 2019, **3**, 1900210.

72. Y. Zhang, L. Li, S. Guo, X. Zhang, F. Li, A. M. Bond and J. Zhang, *ChemSusChem*, 2020, **13**, 59–77.
73. P. R. Yaashikaa, P. Senthil Kumar, S. J. Varjani and A. Saravanan, *J. CO2 Util.*, 2019, **33**, 131–147.
74. M. Yuan, M. J. Kummer and S. D. Minter, *Chem. Eur. J.*, 2019, **25**, 14258–14266.
75. Z. Chen, G. Zhang, J. Prakash, Y. Zheng and S. Sun, *Adv. Energy Mater.*, 2019, **9**, 1900889.
76. K. C. Kwon, J. M. Suh, R. S. Varma, M. Shokouhimehr and H. W. Jang, *Small Methods*, 2019, **3**, 1800492.
77. N. Corbin, J. Zeng, K. Williams and K. Manthiram, *Nano Res.*, 2019, **12**, 2093–2125.
78. C. Kim, F. Dionigi, V. Beermann, X. Wang, T. Möller and P. Strasser, *Adv. Mater.*, 2019, **31**, 1805617.
79. X. M. Hu, S. U. Pedersen and K. Daasbjerg, *Curr. Opin. Electrochem.*, 2019, **15**, 148–154.
80. F. Franco, S. Fernández and J. Lloret-Fillol, *Curr. Opin. Electrochem.*, 2019, **15**, 109–117.
81. W. A. Smith, T. Burdyny, D. A. Vermaas and H. Geerlings, *Joule*, 2019, **3**, 1822–1834.
82. N. Heidary, K. H. Ly and N. Kornienko, *Nano Lett.*, 2019, **19**, 4817–4826.
83. A. Guan, C. Yang, Y. Quan, H. Shen, N. Cao, T. Li, Y. Ji and G. Zheng, *Chem. Asian J.*, 2019, **14**, 3969–3980.
84. S. Zhao, S. Li, T. Guo, S. Zhang, J. Wang, Y. Wu and Y. Chen, *Nano-Micro Lett.*, 2019, **11**, 62.
85. K. Elouarzaki, V. Kannan, V. Jose, H. S. Sabharwal and J. Lee, *Adv. Energy Mater.*, 2019, **9**, 1900090.
86. C. Li, X. Tong, P. Yu, W. Du, J. Wu, H. Rao and Z. M. Wang, *J. Mater. Chem. A*, 2019, **7**, 16622–16642.
87. C. Jiang, A. W. Nichols and C. W. Machan, *Dalton Trans.*, 2019, **48**, 9454–9468.
88. A. W. Nichols and C. W. Machan, *Front. Chem.*, 2019, **7**, 397.
89. S. Xu and E. A. Carter, *Chem. Rev.*, 2019, **119**, 6631–6669.
90. Q. Wang, Y. Lei, D. Wang and Y. Li, *Energy Environ. Sci.*, 2019, **12**, 1730–1750.
91. Y. Zheng, A. Vasileff, X. Zhou, Y. Jiao, M. Jaroniec and S. Z. Qiao, *J. Am. Chem. Soc.*, 2019, **141**, 7646–7659.
92. J. T. Song, H. Song, B. Kim and J. Oh, *Catalysts*, 2019, **9**, 224.
93. J. Wu, T. Sharifi, Y. Gao, T. Zhang and P. M. Ajayan, *Adv. Mater.*, 2019, **31**, 1804257.
94. J. Xie, Y. Huang, M. Wu and Y. Wang, *ChemElectroChem*, 2019, **6**, 1587–1604.



95. B. S. Jayathilake, S. Bhattacharya, N. Vaidehi and S. R. Narayanan, *Acc. Chem. Res.*, 2019, **52**, 676–685.
96. X. Su, X. F. Yang, Y. Huang, B. Liu and T. Zhang, *Acc. Chem. Res.*, 2019, **52**, 656–664.
97. C. Long, X. Li, J. Guo, Y. Shi, S. Liu and Z. Tang, *Small Methods*, 2018, **3**, 1800369.
98. D. Gao, R. M. Arán-Ais, H. S. Jeon and B. Roldan Cuenya, *Nat. Catal.*, 2019, **2**, 198–210.
99. C. W. Lee, C. Kim and B. K. Min, *Nano Converg.*, 2019, **6**, 8.
100. J. W. Wang, W. J. Liu, D. C. Zhong and T. B. Lu, *Coord. Chem. Rev.*, 2019, **378**, 237–261.
